# Supplementary material for: Soil, Hand, and Body Adherence Measures across Four Beach Areas: Potential Influence on Exposure to Oil Spill Chemicals
Source: MDPI journal article supplement (doi:10.3390/ijerph17124196), 2020-06-12
Supplement: s1 [file s1]

## Supplemental Information

**Table S1.** Student's Two-sample t-test for SA (mg/cm<sup>2</sup>) Categories for Beach Locations

| Var                          | Beach Pair | N  | Mean   | Std. Dev | Std. Err | Equality of Variances |                  | Pooled (Equal)<br>DF: t Value<br>Pr >  t | Satterthwaite (Unequal)<br>DF: t Value<br>Pr >  t |
|------------------------------|------------|----|--------|----------|----------|-----------------------|------------------|------------------------------------------|---------------------------------------------------|
|                              |            |    |        |          |          | F                     | Pr               |                                          |                                                   |
| Hand Sand Adherence          | 1-2        | 25 | 58.83  | 58.55    | 11.71    | 3.33                  | <b>0.0045</b>    | 48: -0.17                                | 37: -0.17                                         |
|                              |            | 25 | 61.07  | 32.06    | 6.41     |                       |                  | 0.8678                                   | 0.8680                                            |
|                              | 1-3        | 25 | 58.83  | 58.55    | 11.71    | 72.03                 | <b>&lt;.0001</b> | 48: 3.96                                 | <b>25: 3.96</b>                                   |
|                              |            | 25 | 12.10  | 6.89     | 1.38     |                       |                  | 0.0002                                   | <b>0.0006</b>                                     |
|                              | 1-4        | 25 | 58.83  | 58.55    | 11.71    | 72.71                 | <b>&lt;.0001</b> | 46: 4.08                                 | <b>25: 4.26</b>                                   |
|                              |            | 23 | 8.61   | 6.87     | 1.43     |                       |                  | 0.0002                                   | <b>0.0003</b>                                     |
|                              | 2-3        | 25 | 61.07  | 32.06    | 6.41     | 21.60                 | <b>&lt;.0001</b> | 48: 7.46                                 | <b>26: 7.46</b>                                   |
|                              |            | 25 | 12.10  | 6.90     | 1.38     |                       |                  | <.0001                                   | <b>&lt;.0001</b>                                  |
|                              | 2-4        | 25 | 61.07  | 32.06    | 6.41     | 21.81                 | <b>&lt;.0001</b> | 46: 7.68                                 | <b>26: 7.98</b>                                   |
|                              |            | 23 | 8.61   | 6.87     | 1.43     |                       |                  | <.0001                                   | <b>&lt;.0001</b>                                  |
|                              | 3-4        | 25 | 12.10  | 6.90     | 1.38     | 1.01                  | 0.9870           | 46: 1.76                                 | 46: 1.76                                          |
|                              |            | 23 | 8.61   | 6.87     | 1.43     |                       |                  | 0.0855                                   | 0.0855                                            |
| Full Body Sand Adherence     | 1-2        | 26 | 3.94   | 2.90     | 0.57     | 0.23                  | 0.0003           | <b>57: -3.67</b>                         | <b>48: -3.94</b>                                  |
|                              |            | 33 | 8.72   | 6.10     | 1.06     |                       |                  | <b>0.0005</b>                            | <b>0.0025</b>                                     |
|                              | 1-3        | 26 | 3.94   | 2.90     | 0.57     | 0.54                  | 0.1184           | <b>54: -4.50</b>                         | <b>54: -4.62</b>                                  |
|                              |            | 31 | 8.14   | 3.95     | 0.71     |                       |                  | <b>&lt;.0001</b>                         | <b>&lt;.0001</b>                                  |
|                              | 1-4        | 26 | 3.94   | 2.90     | 0.57     | 0.55                  | 0.1290           | 53: -1.82                                | 51: -1.85                                         |
|                              |            | 29 | 5.64   | 3.93     | 0.73     |                       |                  | 0.0748                                   | 0.0705                                            |
|                              | 2-3        | 33 | 8.72   | 6.10     | 1.06     | 2.39                  | 0.0187           | 62: 0.44                                 | 55: 0.45                                          |
|                              |            | 31 | 8.14   | 3.95     | 0.71     |                       |                  | 0.6598                                   | 0.6559                                            |
|                              | 2-4        | 33 | 8.72   | 6.10     | 1.06     | 2.41                  | 0.0203           | <b>60: 2.32</b>                          | <b>55: 2.38</b>                                   |
|                              |            | 29 | 5.65   | 3.93     | 0.73     |                       |                  | <b>0.0240</b>                            | <b>0.0208</b>                                     |
|                              | 3-4        | 31 | 8.14   | 3.95     | 0.71     | 1.01                  | 0.9798           | <b>58: 2.45</b>                          | <b>58: 2.45</b>                                   |
|                              |            | 29 | 5.65   | 3.93     | 0.73     |                       |                  | <b>0.0173</b>                            | <b>0.0173</b>                                     |
| Adjusted Body Sand Adherence | 1-2        | 22 | 40.14  | 47.73    | 6.81     | 0.21                  | <b>&lt;.0001</b> | 49: -0.78                                | 41: -0.85                                         |
|                              |            | 28 | 58.92  | 105.10   | 10.25    |                       |                  | 0.4402                                   | 0.3984                                            |
|                              | 1-3        | 22 | 40.14  |          |          | 1.90                  | 0.1178           | <b>49: -3.26</b>                         | <b>36: -3.64</b>                                  |
|                              |            | 29 | 141.37 | 139.23   | 11.80    |                       |                  | <b>0.0020</b>                            | <b>0.0008</b>                                     |
|                              | 1-4        | 22 | 40.14  | 34.66    | 5.89     | 1.11                  | 0.783            | 48: -0.81                                | 37: -0.78                                         |
|                              |            | 29 | 30.67  | 34.66    | 5.89     |                       |                  | 0.4205                                   | 0.4205                                            |
|                              | 2-3        | 28 | 58.92  | 105.10   | 10.25    | 0.57                  | 0.1428           | <b>56: -2.54</b>                         | <b>52: -2.54</b>                                  |
|                              |            | 29 | 141.37 | 139.23   | 11.80    |                       |                  | <b>0.0140</b>                            | <b>0.0139</b>                                     |
|                              | 2-4        | 28 | 58.92  | 105.10   | 10.25    | <b>9.20</b>           | <b>&lt;.0001</b> | 55: 1.35                                 | 43: 1.37                                          |
|                              |            | 29 | 30.67  | 34.66    | 5.89     |                       |                  | 0.1817                                   | 0.1789                                            |
|                              | 3-4        | 29 | 141.37 | 139.23   | 11.80    | 16.14                 | <b>&lt;.0001</b> | <b>55: 4.09</b>                          | <b>32: 4.15</b>                                   |
|                              |            | 29 | 30.67  | 34.66    | 5.89     |                       |                  | <b>0.0001</b>                            | <b>0.0002</b>                                     |

1: Crandon, 2: Haulover, 3: Seawall, 4: Stewart. Bold indicates significance

**Table S2.** Tukey's Studentized Range (HSD) Test for Adjusted-Body SA (mg/cm<sup>2</sup>) Compared to Clothing Type

| Comparisons significant at the 0.05 level are indicated by *. |                          |                                    |        |   |
|---------------------------------------------------------------|--------------------------|------------------------------------|--------|---|
| Clothing on pictures                                          | Difference Between Means | Simultaneous 95% Confidence Limits |        |   |
| 3 - 1                                                         | 61.68                    | -25.07                             | 148.42 |   |
| 3 - 5                                                         | 77.20                    | -60.95                             | 215.35 |   |
| 3 - 4                                                         | 93.80                    | 13.72                              | 173.88 | * |
| 3 - 2                                                         | 102.13                   | 28.42                              | 175.83 | * |
| 3 - 7                                                         | 113.28                   | -175.02                            | 401.57 |   |
| 1 - 3                                                         | -61.68                   | -148.42                            | 25.07  |   |
| 1 - 5                                                         | 15.52                    | -127.49                            | 158.54 |   |
| 1 - 4                                                         | 32.12                    | -56.09                             | 120.33 |   |
| 1 - 2                                                         | 40.45                    | -42.02                             | 122.91 |   |
| 1 - 7                                                         | 51.60                    | -239.06                            | 342.26 |   |
| 5 - 3                                                         | -77.20                   | -215.35                            | 60.95  |   |
| 5 - 1                                                         | -15.52                   | -158.54                            | 127.49 |   |
| 5 - 4                                                         | 16.60                    | -122.48                            | 155.67 |   |
| 5 - 2                                                         | 24.92                    | -110.58                            | 160.43 |   |
| 5 - 7                                                         | 36.08                    | -273.83                            | 345.98 |   |
| 4 - 3                                                         | -93.80                   | -173.88                            | -13.72 | * |
| 4 - 1                                                         | -32.12                   | -120.33                            | 56.09  |   |
| 4 - 5                                                         | -16.60                   | -155.67                            | 122.48 |   |
| 4 - 2                                                         | 8.33                     | -67.10                             | 83.75  |   |
| 4 - 7                                                         | 19.48                    | -269.26                            | 308.22 |   |
| 2 - 3                                                         | -102.13                  | -175.83                            | -28.42 | * |
| 2 - 1                                                         | -40.45                   | -122.91                            | 42.02  |   |
| 2 - 5                                                         | -24.92                   | -160.43                            | 110.58 |   |
| 2 - 4                                                         | -8.33                    | -83.75                             | 67.10  |   |
| 2 - 7                                                         | 11.15                    | -275.88                            | 298.19 |   |
| 7 - 3                                                         | -113.28                  | -401.57                            | 175.02 |   |
| 7 - 1                                                         | -51.60                   | -342.26                            | 239.06 |   |
| 7 - 5                                                         | -36.08                   | -345.98                            | 273.83 |   |
| 7 - 4                                                         | -19.48                   | -308.22                            | 269.26 |   |
| 7 - 2                                                         | -11.15                   | -298.19                            | 275.88 |   |

Clothing Type of 1: bathing suit, 2: bathing suit, short, dress or shirt 3: short, dress or shirt, 4: short, shirt and shoes 5: short, 6: diaper, 7: full body clothing).

**Table S3. Clothing type vs. Full Body SA.**

| Clothing Type | N  | Mean Full Body-SA (mg/cm <sup>2</sup> ) |
|---------------|----|-----------------------------------------|
| 1             | 22 | 7.17                                    |
| 2             | 33 | 6.91                                    |
| 3             | 30 | 6.52                                    |
| 4             | 28 | 6.13                                    |
| 5             | 4  | 11.42                                   |
| 6             | 1  | 6.40                                    |
| 7             | 1  | 0.93                                    |

Clothing Type of 1: bathing suit, 2: bathing suit, short, dress or shirt 3: short, dress or shirt, 4: short, shirt and shoes 5: short, 6: diaper, 7: full body clothing).

**Table S4. Clothing type vs. Adjusted-Body SA.**

| Clothing Type | N  | Mean Adjusted Body SA (mg/cm <sup>2</sup> ) |
|---------------|----|---------------------------------------------|
| 1             | 21 | 36.17                                       |
| 2             | 29 | 67.59                                       |
| 3             | 27 | 109.46                                      |
| 4             | 25 | 41.24                                       |
| 5             | 4  | 196.23                                      |
| 6             | 1  | 12.92                                       |
| 7             | 1  | 46.30                                       |

Clothing Type of 1: bathing suit, 2: bathing suit, short, dress or shirt 3: short, dress or shirt, 4: short, shirt and shoes 5: short, 6: diaper, 7: full body clothing).

**Table S5. Clothing Type vs. Full Body SA By Sex.**

| Sex    | Clothing Type | N  | Mean Full Body SA (mg/cm <sup>2</sup> ) |
|--------|---------------|----|-----------------------------------------|
| Male   | 1             | 13 | 10.10                                   |
|        | 2             | 8  | 7.32                                    |
|        | 3             | 22 | 7.30                                    |
|        | 4             | 6  | 7.10                                    |
|        | 5             | 3  | 8.89                                    |
| Female | 1             | 20 | 9.40                                    |
|        | 2             | 35 | 5.01                                    |
|        | 3             | 30 | 6.81                                    |
|        | 4             | 27 | 6.30                                    |
|        | 5             | 6  | 10.41                                   |
|        | 7             | 1  | 5.78                                    |

**Table S6. Comparisons for Body-SA for the Children Wearing Shoes during Pool Rinses.**

| <b>Shoes Worn into Pool</b> | <b>Variable</b>                             | <b>Mean</b> | <b>Std. Dev</b> | <b>Minimum</b> | <b>Maximum</b> | <b>N</b> |
|-----------------------------|---------------------------------------------|-------------|-----------------|----------------|----------------|----------|
| <b>No</b>                   | <b>Adjusted Body SA (mg/cm<sup>2</sup>)</b> | 78.55       | 114.26          | 4.62           | 572.28         | 83       |
|                             | <b>Full Body SA (mg/cm<sup>2</sup>)</b>     | 7.02        | 4.84            | 0.36           | 23.17          | 93       |
| <b>Yes</b>                  | <b>Adjusted Body SA (mg/cm<sup>2</sup>)</b> | 41.24       | 45.36           | 1.99           | 188.00         | 25       |
|                             | <b>Full Body SA (mg/cm<sup>2</sup>)</b>     | 5.90        | 4.71            | 0.16           | 18.18          | 26       |
